# Supplementary material for: Identification of Virulent Capnocytophaga canimorsus Isolates by Capsular Typing
Source: PubMed Central journal article supplement (PMC5442547; doi:10.1128/jcm.00249-17), 2017-05-23
Supplement: JCM.00249-17_zjm999095527s1.pdf [file JCM.00249-17_zjm999095527s1.pdf]

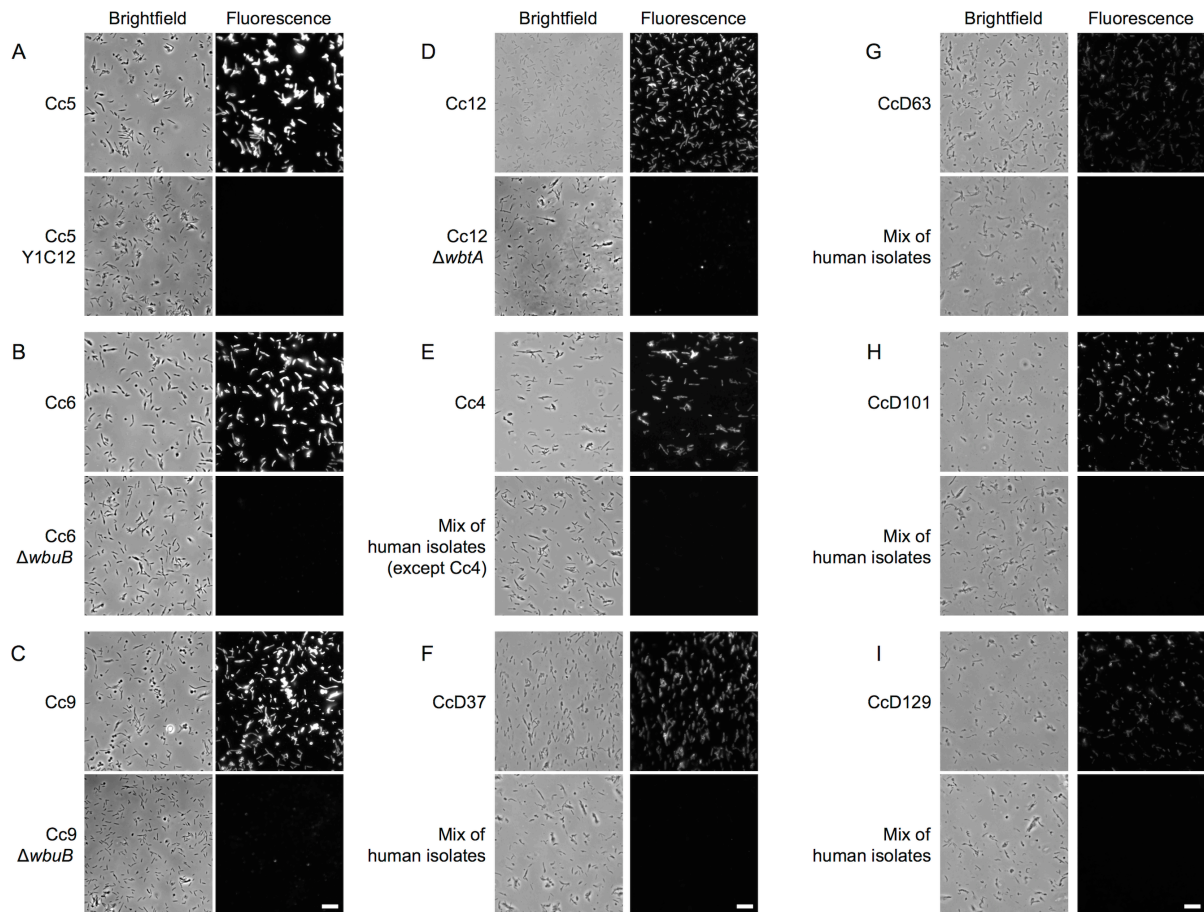

**Figure S1. Control of the serum adsorption efficacy by immunofluorescence microscopy.** Paraformaldehyde-fixed bacteria were stained using the following sera: Y1C12-adsorbed anti-Cc5 (A), Cc6  $\Delta wbuB$ -adsorbed anti-Cc6 (B), Cc9  $\Delta wbuB$ -adsorbed anti-Cc9 (C), Cc12  $\Delta wbtA$ -adsorbed anti-Cc12, anti-Cc4 adsorbed with all human isolates except Cc4 (E), anti-CcD37 adsorbed with all human isolates (F), anti-CcD63 adsorbed with all human isolates (G), anti-CcD101 adsorbed with all human isolates (H), and anti CcD129 adsorbed with all human isolates used in this study (I). Bar, 10  $\mu\text{m}$ .

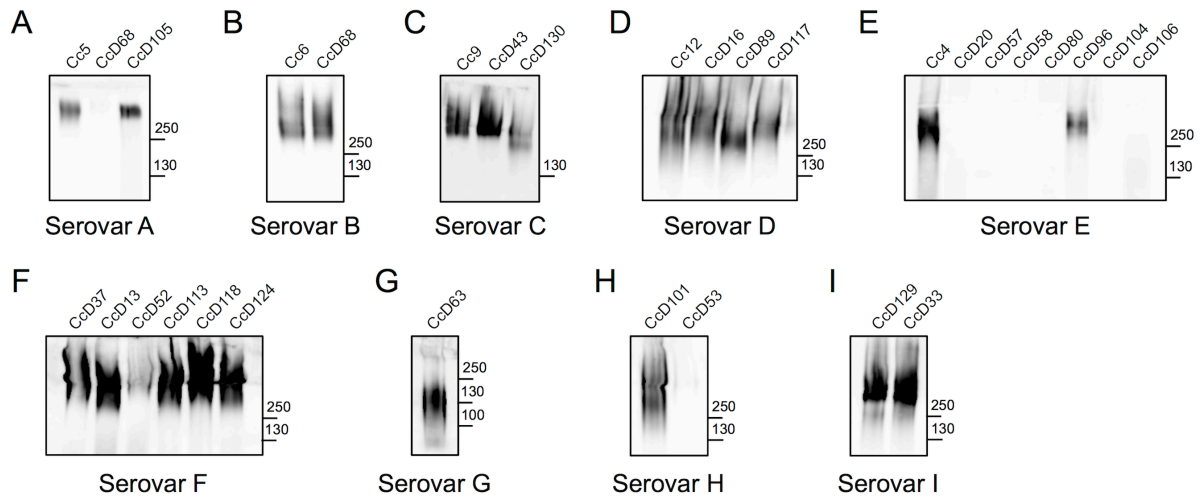

**Figure S2. Analysis of high molecular weight polysaccharide structures from the dog isolates found positive by ELISA screening.** Western blot analysis of proteinase K treated lysates of *C. canimorsus* dog isolates using the following sera: Y1C12 adsorbed anti-Cc5 (A), Cc6  $\Delta wbuB$  adsorbed anti-Cc6 (B), Cc9  $\Delta wbuB$  adsorbed anti-Cc9 (C), Cc12  $\Delta wbtA$  adsorbed anti-Cc12 (D), anti-Cc4 adsorbed with all human isolates except Cc4 (E), anti CcD37 adsorbed with all human isolates (F), anti CcD63 adsorbed with all human isolates (G), anti CcD101 adsorbed with all human isolates (H), and anti CcD129 adsorbed with all human isolates (I). Numbers correspond to molecular mass markers in kDa.

| Serovar | Isolate | Locus           | Sequence                                         |
|---------|---------|-----------------|--------------------------------------------------|
| B       | Cc6     | (CC6_1430035)   | ATGATTAACAAAATTCTAATAGATAATTCAAATCTTTTTGCA...    |
| B       | Cc11    | (CCAN11_10027)  | ATGATTAACAAAATTCTAATAGATAATTCAAATCTTTTTGCA...    |
| A       | Cc5     | (Ccan_23290)    | ATGATTAACAAAATTCTAATAGATAATTCAAATCTTTTTGCA...    |
| A       | Cc2     | (CCAN2_1430008) | ATG - - - - AAAATATTAATAGATAATTCAAACCTTTTTGCA... |
| C       | Cc9     | (CCAN9_740032)  | ATG - - - - AAAATATTAATAGATAATTCAAACCTTTTTGCA... |

**Figure S3. Detection of the serovar B by PCR.** Alignment of the first 42 nucleotides of the glycosyl transferase 1 genes amplified for the detection of the serovar B. Underlined is the sequence of the oligonucleotide (8246) that anneals to the target genes. Dashed lines indicate missing nucleotides while in red are the mismatches.

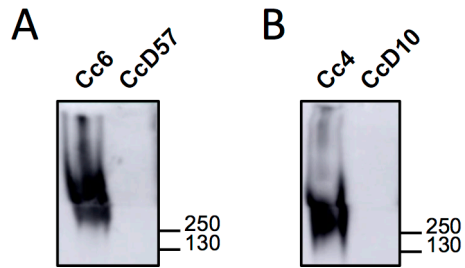

**Figure S4. Analysis of high molecular weight polysaccharide structures from the dog isolates found positive by PCR screening.** Western blot analysis of proteinase-K treated lysates of the dog isolates: CcD57 using the Cc6  $\Delta wbuB$  adsorbed anti-Cc6 serum (A) and CcD10 using anti-Cc4 adsorbed with all human isolates except Cc4 serum (B). Cc4 and Cc6 proteinase-K treated lysates have been loaded as controls. Numbers correspond to molecular mass markers in kDa.

**Table S1: *C. canimorsus* isolated from patients and dogs used in this study**

| Clinical strains/isolates |                      |                                                                                                                         |                                                                |                                                                                                          |                      |           |
|---------------------------|----------------------|-------------------------------------------------------------------------------------------------------------------------|----------------------------------------------------------------|----------------------------------------------------------------------------------------------------------|----------------------|-----------|
| Strain/<br>Isolate<br>ID  | Infection<br>outcome | Patient medical history                                                                                                 | Collection                                                     | History and geographical origin                                                                          | Year of<br>isolation | Reference |
| Cc1                       | NK                   | NK                                                                                                                      | BCCM/LMG 11511;<br>CCUG 17234; strain<br>P810; strain SSI P810 | BCCM/LMG < CCUG Sweden <<br>W.Frederiksen < J.Ursing, Malmö,<br>Sweden                                   | NK                   | (1)       |
| Cc2                       | Fatal                | 47 y/o F, previously<br>healthy                                                                                         | ...                                                            | G. Wauters & M. Delmee, Cliniques<br>Universitaires St Luc, Brussels,<br>Belgium                         | 1989                 | (2)       |
| Cc3                       | Fatal                | Elderly, chronic<br>respiratory disease and<br>alcohol abuse                                                            | ...                                                            | G. Wauters & M. Delmee < Sint-Jan<br>Hospital, Brugges, Belgium                                          | 1990                 | (3)       |
| Cc4                       | Fatal                | 49 y/o F, HIV-HCV<br>coinfection, blindness due<br>to CMV retinitis, aortic<br>valve and ascending<br>aorta replacement | ...                                                            | J. Schrenzel, Hopitaux Universitaires<br>de Genève, Switzerland                                          | 2010                 | (4)       |
| Cc5                       | Fatal                | NK                                                                                                                      | BCCM/LMG 28512                                                 | G. Wauters & M. Delmee < Clinic of<br>Libramont, Libramont, Belgium                                      | 1995                 | (5)       |
| Cc6                       | NK                   | NK                                                                                                                      | ...                                                            | KU Leuven, Leuven, Belgium                                                                               | 1996                 | (6)       |
| Cc7                       | NK                   | NK                                                                                                                      | ...                                                            | G. Wauters & M. Delmee, < KU<br>Leuven, Leuven, Belgium                                                  | 1998                 | (5)       |
| Cc8                       | NK                   | 52 y/o M, previously<br>healthy                                                                                         | ...                                                            | M. Delmee < Liège, Belgium                                                                               | 2004                 | (6)       |
| Cc9                       | NK                   | NK                                                                                                                      | BCCM/LMG 11510,<br>CCUG 12569, CDC<br>A3626                    | BCCM/LMG, CCUG < R. Weaver,<br>CDC, Atlanta, Georgia < Virginia, USA                                     | 1965                 | (7)       |
| Cc10                      | NK                   | NK                                                                                                                      | BCCM/G 11541,<br>CCUG 24741, ATCC<br>35978, CDC C8936          | BCCM/LMG, MCCM, ATCC < R.<br>Weaver, CDC, Atlanta, Georgia <<br>California Health Dept., California, USA | NK                   | (7)       |

|      |          |                                                 |                                     |                                                                                                                              |      |     |
|------|----------|-------------------------------------------------|-------------------------------------|------------------------------------------------------------------------------------------------------------------------------|------|-----|
| Cc11 | NK       | NK                                              | BCCM/LMG 11551,<br>MCCM 01373       | BCCM/LM < MCCM < A. von<br>Graevenitz, Unersität Zurich,<br>Switzerland                                                      | 1990 | (7) |
| Cc12 | Recovery | 17 y/o M, splenectomized                        | ATCC 35979, CDC<br>7120, CCUG 53895 | ATCC < R.Weaver, CDC Atlanta<br>Georgia < California Health Dept. <<br>San Antonio Community Hospital,<br>California, USA    | 1961 | (8) |
| Cc13 | Fatal    | 54 y/o M, previously<br>healthy                 | ...                                 | F.S. Stals, Laurentius Ziekenhuis,<br>Roermond, The Netherlands                                                              | 2008 | (9) |
| Cc14 | NK       | NK                                              | ...                                 | R. Jarsumbeck, Medizinisches labor<br>Ostsachsen, Dresden, Germany                                                           | 2011 | (6) |
| Cc15 | Fatal    | NK                                              | ...                                 | K. Mühlemann, University Hospital<br>Bern, Switzerland                                                                       | 2011 | (6) |
| Cc16 | Fatal    | 59 y/o M, colon cancer,<br>intestinal occlusion | ...                                 | G. Glupczynski, Centre Hospitalier<br>Universitaire Mont Godinne < D.<br>Olivier, Hopital Univ. Erasme, Brussels,<br>Belgium | NK   | (6) |
| Cc17 | Recovery | 77 y/o F, no<br>immunosuppression<br>known      | ...                                 | G. Glupczynski, Centre Hospitalier<br>Universitaire Mont Godinne < D.<br>Olivier, Hopital Univ. Erasme, Brussels,<br>Belgium | NK   | (6) |
| Cc18 | Recovery | 62 y/o F, kidney<br>transplantation             | ...                                 | G. Glupczynski, Centre Hospitalier<br>Universitaire Mont Godinne < D.<br>Olivier, Hopital Univ. Erasme, Brussels,<br>Belgium | NK   | (6) |
| Cc19 | Recovery | 49 y/o M, cardiovascular<br>history             | ...                                 | A. Magnette, Centre Hospitalier<br>Universitaire Mont-Godinne < M<br>Delmée < Clinique Saint Pierre,<br>Ottignies, Belgium   | 2010 | (6) |
| Cc20 | NK       | NK                                              | CCUG 55909                          | CCUG < E. Ek, Blood Dept, PHLS,<br>Göteborg, Sweden < UK National<br>External Quality assessment,<br>Colindale, London, UK   | 2008 | ... |
| Cc21 | NK       | 45 y/o M                                        | CCUG 60839                          | CCUG < E. Ek, Blood Dept, PHLS,<br>Göteborg, Sweden                                                                          | 2011 | ... |
| Cc22 | NK       | NK                                              | CCUG 20318                          | CCUG < W. Frederiksen, Statens<br>Seruminstitut, Copenhagen, Denmark                                                         | 1986 | ... |

| Cc23          | NK                 | NK         | CCUG 48899           | CCUG < V. Roux & D. Raoult, Marseille, France                                             | ...       | ... |
|---------------|--------------------|------------|----------------------|-------------------------------------------------------------------------------------------|-----------|-----|
| Cc24          | NK                 | 56 y/o M   | CCUG 67384           | CCUG < PHLS, Uddevalla < Trollhätten, Sweden                                              | 2015      | ... |
| Cc25          | NK                 | 58 y/o M   | CCUG 66222           | CCUG < I. Adlerberth, Blood Dept, PHLS, Sahlgrenska University Hospital, Göteborg, Sweden | 2014      | ... |
| Dog isolates  |                    |            |                      |                                                                                           |           |     |
| Strain ID     | Biological history | Collection | Geographical history | Year of isolation                                                                         | Reference |     |
| CcD3-CcD101   | Dog mouth          | ...        | Switzerland          | 2008                                                                                      | (6)       |     |
| CcD104-CcD105 | Dog mouth          | ...        | Switzerland          | 2005                                                                                      | (6)       |     |
| CcD106        | Dog mouth          | ...        | Switzerland          | 2006                                                                                      | (6)       |     |
| CcD113-CcD131 | Dog mouth          | ...        | Belgium              | 2014                                                                                      | (6)       |     |

All human isolates / strains listed were isolated from human septicemia cases except Cc4, which was isolated from a prosthetic aortitis case.

NK, not known by the authors. F, female; M, male. y/o, year old. HIV, human immunodeficiency virus; HCV, hepatitis C virus; CMV, cytomegalovirus. BCCM/LMG, belgian co-ordinated collections of microorganisms / laboratory of microbiology University of Ghent. CCUG, culture collection, University of Göteborg, Sweden. MCCM, medical culture collection Marburg. PHLS, public health laboratory service.

### References

1. Heltberg O, Busk HE, Bremmelgaard A, Kristiansen JE, Frederiksen W. 1984. The cultivation and rapid enzyme identification of DF-2. Eur J Clin Microbiol 3:241-243.
2. Hantson P, Gautier PE, Vekemans MC, Fievez P, Evrard P, Wauters G, Mahieu P. 1991. Fatal Capnocytophaga canimorsus septicemia in a previously healthy woman. Ann Emerg Med 20:93-94.

3. Vanhosebrouck AY, Gordts B, Wauters G, Van Landuyt HW. 1991. Fatal septicemia with *Capnocytophaga canimorsus* in a compromised host. A case report with review of the literature. *Acta Clin Belg* 46:364-370.
4. Rougemont M, Ratib O, Wintsch J, Schrenzel J, Hirschel B. 2013. *Capnocytophaga canimorsus* prosthetic aortitis in an HIV-positive woman. *J Clin Microbiol* 51:2769-2771.
5. Shin H, Mally M, Kuhn M, Paroz C, Cornelis GR. 2007. Escape from immune surveillance by *Capnocytophaga canimorsus*. *J Infect Dis* 195:375-386.
6. Renzi F, Dol M, Raymackers A, Manfredi P, Cornelis GR. 2016. Only a subset of *C. canimorsus* strains is dangerous for humans. *Emerg Microbes Infect* 5:e29.
7. Vandamme P, Vancanneyt M, van Belkum A, Segers P, Quint WG, Kersters K, Paster BJ, Dewhirst FE. 1996. Polyphasic analysis of strains of the genus *Capnocytophaga* and Centers for Disease Control group DF-3. *Int J Syst Bacteriol* 46:782-791.
8. Butler T, Weaver RE, Ramani TK, Uyeda CT, Bobo RA, Ryu JS, Kohler RB. 1977. Unidentified gram-negative rod infection. A new disease of man. *Ann Intern Med* 86:1-5.
9. Kleijnen-Grebien B, Boorsma S, Stals FS, van Schelven R. 2008. Fatal case of sepsis with *Capnocytophaga canimorsus* after a minor dog bite. *Ned Tijdschr Geneesk* 152:1882-1885.



**Table S2: *C. canimorsus* mutants and *E. coli* strains used in this study**

| Strain ID                   | Genotype                                                                                                                                                                                          | Reference  |
|-----------------------------|---------------------------------------------------------------------------------------------------------------------------------------------------------------------------------------------------|------------|
| <b><i>E. coli</i></b>       |                                                                                                                                                                                                   |            |
| Top10                       | F <sup>-</sup> <i>mcrA</i> Δ( <i>mrr-hsdRMS-mcrBC</i> ) φ80 <i>lacZ</i> ΔM15<br>Δ <i>lacX74 recA1 araD139</i> Δ( <i>araleu</i> )7697 <i>galU galK rpsL</i><br><i>endA1 nupG</i> ; Sm <sup>r</sup> | Invitrogen |
| S17-1                       | <i>hsdR17 recA1</i> RP4-2- <i>tet::Mu1kan::Tn7</i> ; Sm <sup>r</sup>                                                                                                                              | (1)        |
| <b><i>C. canimorsus</i></b> |                                                                                                                                                                                                   |            |
| Y1C12                       | <i>C. canimorsus</i> 5 <i>Ccan_23370::Tn4351</i> ; Ery <sup>r</sup>                                                                                                                               | (2)        |
| Cc6<br>Δ <i>wbuB</i>        | Replacement of <i>Cc6_1430029</i> in <i>C. canimorsus</i> 6 by<br><i>ermF</i> using primers 7958, 7959, 7962, 7975, 7961,<br>7974; Ery <sup>r</sup>                                               | This study |
| Cc9<br>Δ <i>wbuB</i>        | Replacement of <i>CCAN9_740038</i> in <i>C. canimorsus</i> 9<br>by <i>ermF</i> using primers 7958, 7959, 7960, 7961, 7962,<br>7963; Ery <sup>r</sup>                                              | This study |
| Cc12<br>Δ <i>wbtA</i>       | Replacement of<br><i>CCAN12_760057</i> in <i>C. canimorsus</i> 12 by <i>ermF</i> using<br>primers 8063, 8064, 8065, 8066, 8067, 8068; Ery <sup>r</sup>                                            | This study |

## References

1. Simon R, Priefer U, Puhler A. 1983. A Broad Host Range Mobilization System for In Vivo Genetic Engineering: Transposon Mutagenesis in Gram Negative Bacteria. *Nat Biotech* 1:784-791.
2. Shin H, Mally M, Meyer S, Fiechter C, Paroz C, Zaehring U, Cornelis GR. 2009. Resistance of *Capnocytophaga canimorsus* to killing by human complement and polymorphonuclear leukocytes. *Infect Immun* 77:2262-2271.

**Table S3. Oligonucleotides used in this study**

| Ref. | Name          | Sequence 5'-3'                                      | Restriction  | Gene             |
|------|---------------|-----------------------------------------------------|--------------|------------------|
| 7958 | wbuB6/9-KO1.1 | GGCTGCAGAAGAATTTCCGAGGGCTGATG                       | <i>Pst</i> I | <i>wbuB</i>      |
| 7959 | wbuB6/9-KO1.2 | CTATGATGTTGCAAATACCGATGAGCACTTTT<br>TATATTTCTTCGCT  |              | <i>wbuB</i>      |
| 7962 | wbuB6/9-KO3.1 | AGCGAAGAAATATAAAAAGTGCTCATCGGTAT<br>TTGCAACATCATAG  |              | <i>ermF</i>      |
| 7975 | wbuB6-KO3.2   | AAACTCCTGTGATGATGTTTTCTACGAAGGAT<br>GAAATTTTTCAGG   |              | <i>ermF</i>      |
| 7974 | wbuB6-KO2.1   | CCTGAAAAATTTTCATCCTTCGTAGAAACCATC<br>ATCACAGGAGTTT  |              | <i>wbuB</i>      |
| 7961 | wbuB6/9-KO2.2 | CCACTAGTAGGAATGCCTTTCTCTACTATC                      | <i>Spe</i> I | <i>wbuB</i>      |
| 7963 | wbuB9-KO3.2   | AAGCTCCTGTGATGATGATTTCTACGAAGGAT<br>GAAATTTTTCAGG   |              | <i>ermF</i>      |
| 7960 | wbuB9KO2.1    | CCTGAAAAATTTTCATCCTTCGTAGAAATCATC<br>ATCACAGGAGCTT  |              | <i>wbuB</i>      |
| 8063 | wbtA12-KO1.1  | GGCTGCAGTCGCATATTGGGTACAACATAG                      | <i>Pst</i> I | <i>wbtA</i>      |
| 8064 | wbtA12-KO1.2  | CTATGATGTTGCAAATACCGATGAGCTTTTGG<br>TTAGTATAAAAATGG |              | <i>wbtA</i>      |
| 8067 | wbtA12-KO3.1  | CCATTTTTATACTAACCAAAAGCTCATCGGTA<br>TTTGAACATCATAG  |              | <i>ermF</i>      |
| 8068 | wbtA12-KO3.2  | CCTTTCATAGTATTTAATATTCTACGAAGGAT<br>GAAATTTTTCAGG   |              | <i>ermF</i>      |
| 8065 | wbtA12-KO-2.1 | CCTGAAAAATTTTCATCCTTCGTAGAATATTA<br>ATACTATGAAAGG   |              | <i>wbtA</i>      |
| 8066 | wbtA12-KO-2.2 | CCACTAGTTCTCTTCGATGGAAAGTACG                        | <i>Spe</i> I | <i>wbtA</i>      |
| 8244 | SeroA-fw      | CATACCATGGGAAAAAAAGTACCAATAGTTTT<br>TATATTTAACC     | <i>Nco</i> I | <i>A4GalT GT</i> |
| 8245 | SeroA-rev     | CCGCTCGAGTCATTTTTTTATCTTTTTTAATAT<br>ATTCCAC        | <i>Xho</i> I | <i>A4GalT GT</i> |
| 8246 | SeroB-fw      | CATACCATGGGAATTAACAAAATTCTAATAG                     | <i>Nco</i> I | <i>GT1</i>       |
| 8247 | SeroB-rev     | CCGCTCGAGTTATTTTTTATTTTCATTAG                       | <i>Xho</i> I | <i>GT1</i>       |
| 8274 | SeroC-fw      | GGCGTATATCGTTGCTATTTTGTATG                          |              | <i>wzy</i>       |
| 8275 | SeroC-rev     | CTATTAATATTTTCATTGTACACCACTTC                       |              | <i>wzy</i>       |
| 8276 | SeroD-fw      | GATTTAAAAAATATAGTATTTTAGGAATTATCG                   |              | <i>WbbJ</i>      |
| 8277 | SeroD-rev     | CTATACTTGTTCCCACTTTTTAGTTTC                         |              | <i>WbbJ</i>      |
| 8278 | SeroE-fw      | GGAGGAGGAAAAGTATTATTAGATTATC                        |              | <i>GT1</i>       |
| 8279 | SeroE-rev     | CTATTCATAATTCTTAAAGATACTTATCAATTC                   |              | <i>GT1</i>       |
| 8296 | SeroABC-fw    | CTTGTTAGGTAAAGTTGCCTTAC                             |              | <i>wfdR</i>      |
| 8297 | SeroABC-rev   | CAACATTTCTCCCATCTTATAATCCC                          |              | <i>wfdR</i>      |

**Table S4. Accession numbers of genes used in this study**

| <b>Serovar</b> | <b>Strain</b> | <b>Gene name</b> | <b>Locus</b>          | <b>Accession</b> |
|----------------|---------------|------------------|-----------------------|------------------|
| A              | Cc5           | <i>A4GalT GT</i> | <i>Ccan_23210</i>     | NC_015846.1      |
| A              | Cc5           | <i>wbuB</i>      | <i>Ccan_23370</i>     | NC_015846.1      |
| A              | Cc5           | <i>wbtA</i>      | <i>Ccan_23400</i>     | NC_015846.1      |
| A              | Cc5           | <i>wfdR</i>      | <i>Ccan_23240</i>     | NC_015846.1      |
| A              | Cc2           | <i>A4GalT GT</i> | <i>CCAN2_1920004</i>  | CDOJ01000104.1   |
| A              | Cc2           | <i>GT1</i>       | <i>CCAN2_1430008</i>  | CDOJ01000050.1   |
| A              | Cc2           | <i>wfdR</i>      | <i>CCAN2_1430002</i>  | CDOJ01000050.1   |
| B              | Cc6           | <i>wbuB</i>      | <i>Cc6_1430029</i>    | LT838810         |
| B              | Cc6           | <i>GT1</i>       | <i>CC6_1430035</i>    | LT838810         |
| B              | Cc6           | <i>wfdR</i>      | <i>CC6_1430040</i>    | LT838810         |
| B              | Cc11          | <i>GT1</i>       | <i>CCAN11_10027</i>   | CDOK01000001.1   |
| B              | Cc11          | <i>wfdR</i>      | <i>CCAN11_2010013</i> | CDOK01000115.1   |
| C              | Cc9           | <i>wbuB</i>      | <i>CCAN9_740038</i>   | LT838811         |
| C              | Cc9           | <i>wzy</i>       | <i>CCAN9_740031</i>   | LT838811         |
| C              | Cc9           | <i>GT1</i>       | <i>CCAN9_740032</i>   | LT838811         |
| C              | Cc9           | <i>wfdR</i>      | <i>CCAN9_740027</i>   | LT838811         |
| D              | Cc12          | <i>wbtA</i>      | <i>CCAN12_760057</i>  | CDOE01000074.1   |
| D              | Cc12          | <i>Wbbj</i>      | <i>CCAN12_760043</i>  | CDOE01000074.1   |
| E              | Cc4           | <i>wbtA</i>      | <i>CC4_530070</i>     | LT838812         |
| E              | Cc4           | <i>GT1</i>       | <i>CC4_530066</i>     | LT838812         |

**Table S5: Capsular serovars distribution according to isolates geographical origin**

| Serovar     | Geographical origin |                         | Isolate ID |
|-------------|---------------------|-------------------------|------------|
|             | Country             | State and/or city       |            |
| A           | Sweden              | Malmö                   | Cc1        |
|             |                     | Göteborg                | Cc21       |
|             |                     |                         | Cc25       |
|             |                     | Tröllhättan             | Cc24       |
|             | Belgium             | Brussels                | Cc2        |
|             |                     | Brugges                 | Cc3        |
|             |                     | Libramont               | Cc5        |
|             | USA                 | California              | Cc10       |
|             | Netherlands         | Roermond                | Cc13       |
| Denmark     | ...                 | Cc22                    |            |
| Switzerland | Bern                | Cc15                    |            |
| B           | Belgium             | Leuven                  | Cc6        |
|             |                     | Liège                   | Cc8        |
|             |                     | Brussels                | Cc16       |
|             |                     |                         | Cc17       |
|             |                     |                         | Cc18       |
|             | Switzerland         | Zurich                  | Cc11       |
| France      | Marseille           | Cc23                    |            |
| C           | USA                 | Virginia                | Cc9        |
|             | Germany             | Dresden                 | Cc14       |
|             | Belgium             | Ottignies               | Cc19       |
|             | UK                  | Colindale               | Cc20       |
| D           | Belgium             | Leuven                  | Cc7        |
|             | USA                 | California, San Antonio | Cc12       |
| E           | Switzerland         | Geneva                  | Cc4        |
